# Supplementary material for: Risk factors and symptom clusters for Long Covid: analysis of United Kingdom symptom tracker app data
Source: bioRxiv or medRxiv preprint supplement (doi:10.1101/2022.11.14.22282285), 2022-11-14

Supplementary Materials: Risk Coefficients for Long Covid for Individual Features, by Age Groups

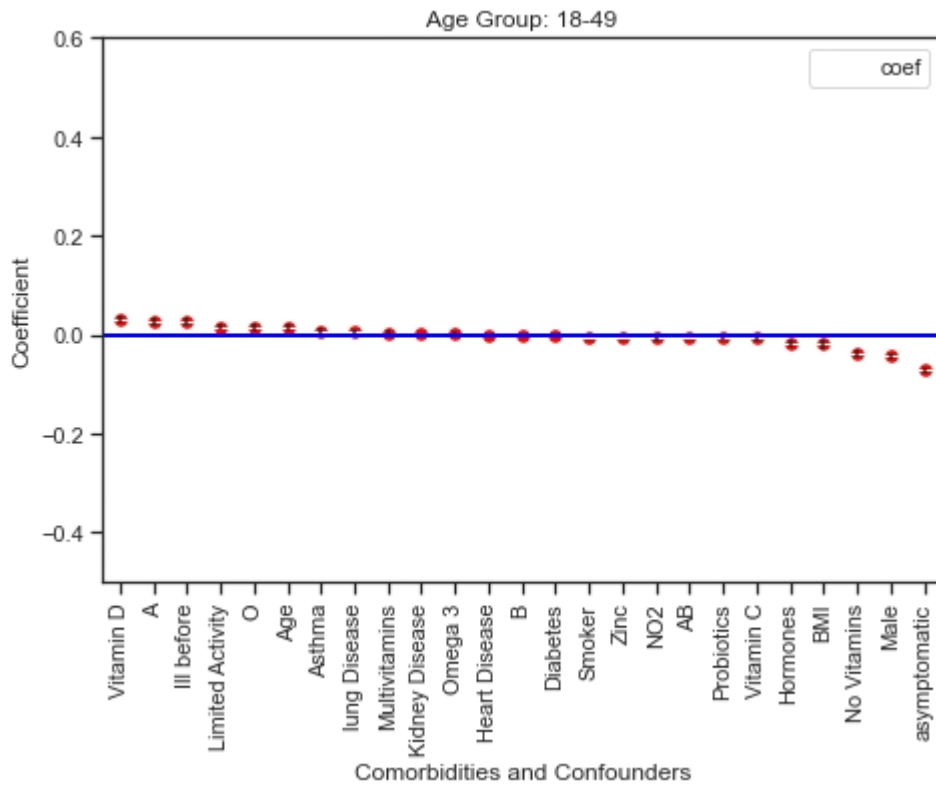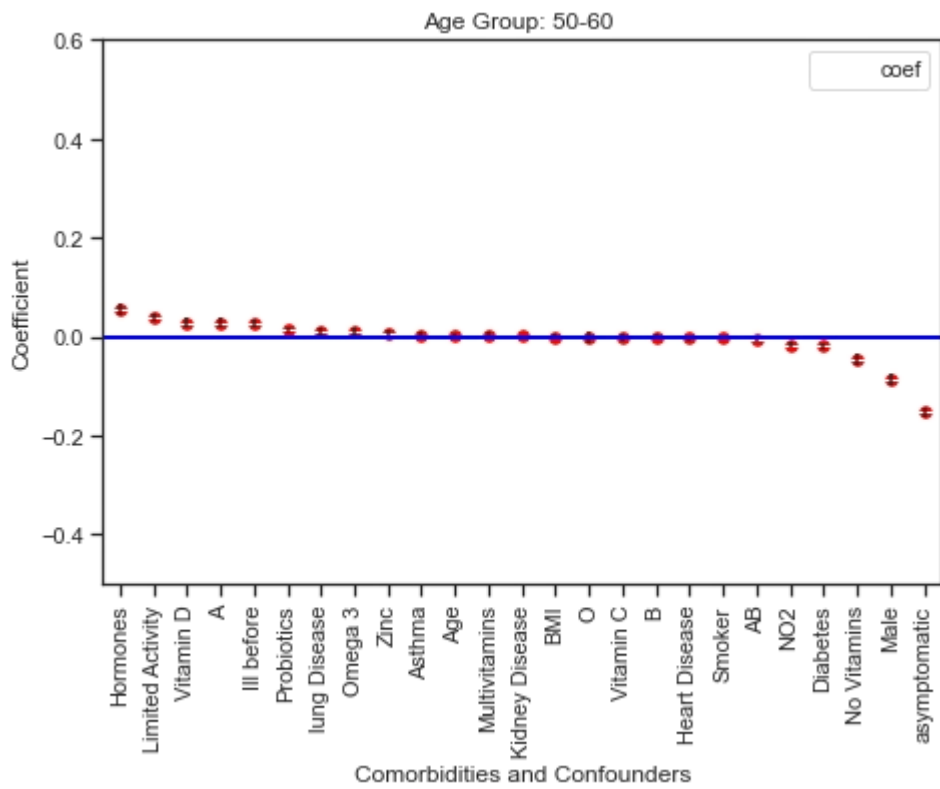

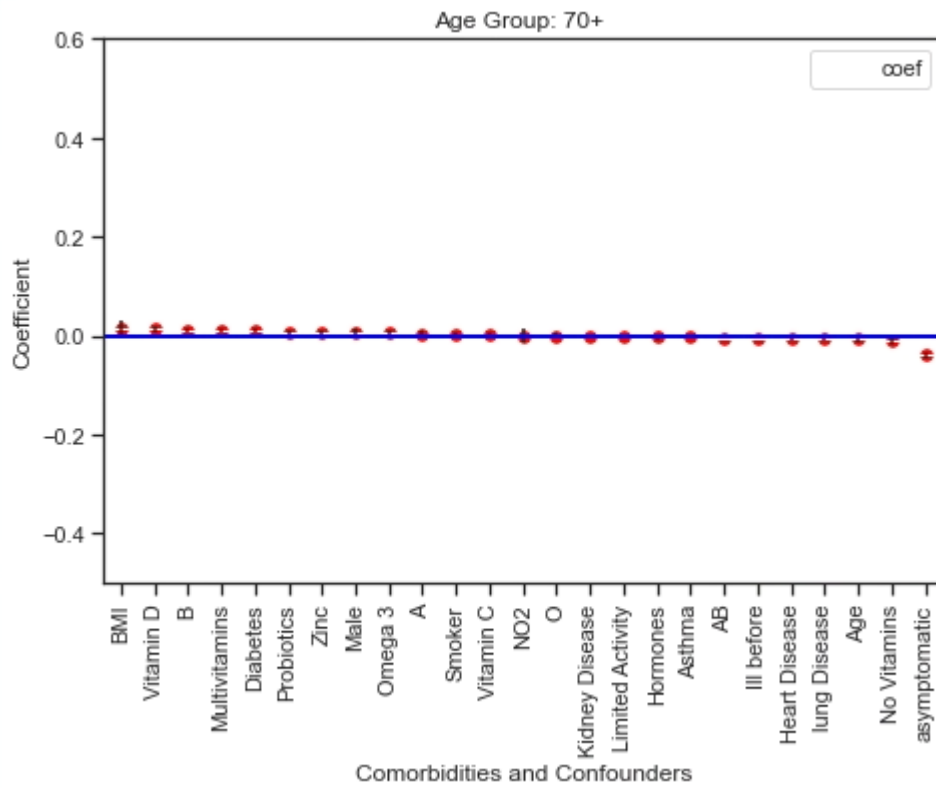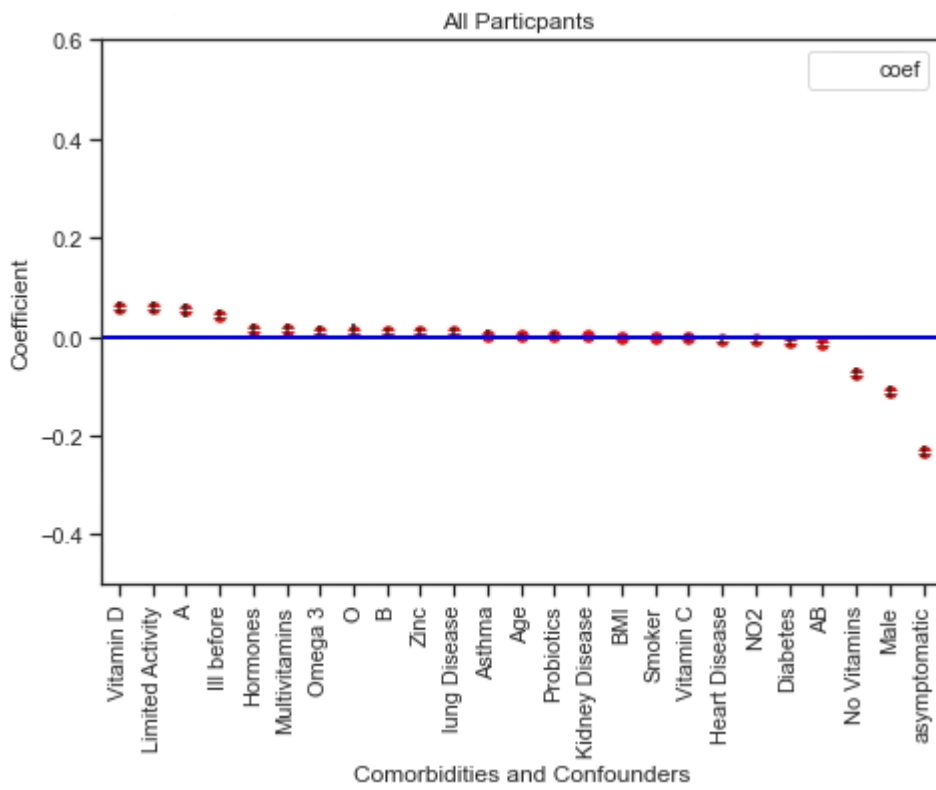

Supplement: Supplementary file [file media-1.pdf]
